# Supplementary material for: Very Early Response Evaluation by PET/MR in Patients with Lung Cancer—Timing and Feasibility
Source: MDPI journal article supplement (doi:10.3390/diagnostics9010035), 2019-03-26
Supplement: s1 [file s1]

## Appendix 1

Response patterns as measured by diffusion weighted MRI (DWI) and FDG-PET in the individual patients. Results from DWI are presented as  $ADC_{mean}$  and  $ADC_{median}$  (mean and median apparent diffusion coefficient). Results from FDG-PET is presented as  $SUV_{max}$  and  $SUV_{peak}$  (maximum and peak standardized uptake value) together with  $PERCIST_{ref}$  (SUV in a reference region in the liver measured according to the PERCIST recommendations[1]).

Patient 1

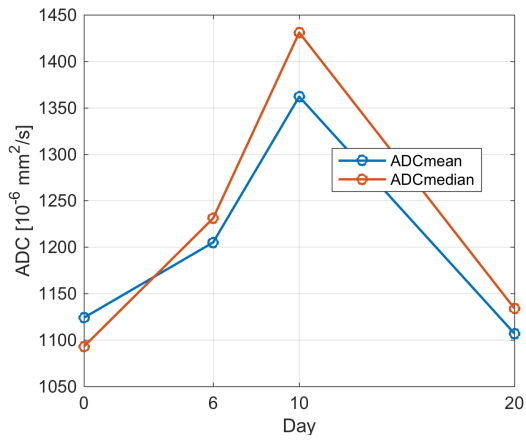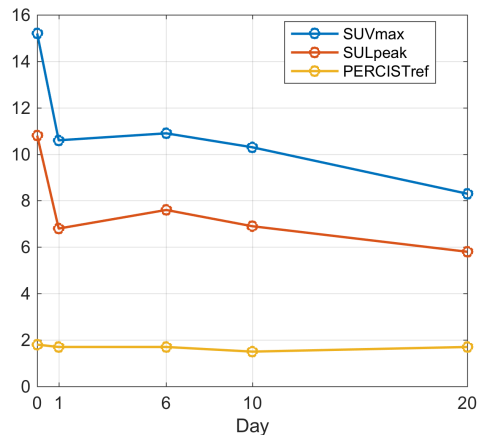

Patient 2

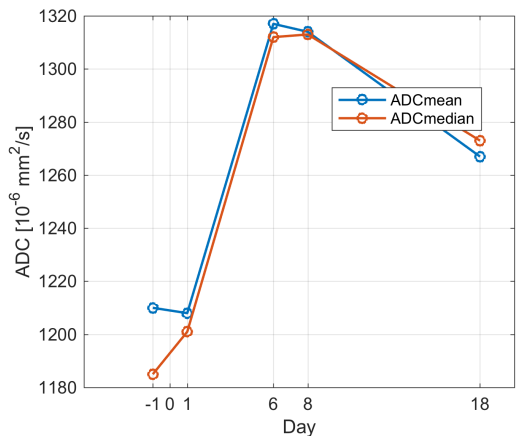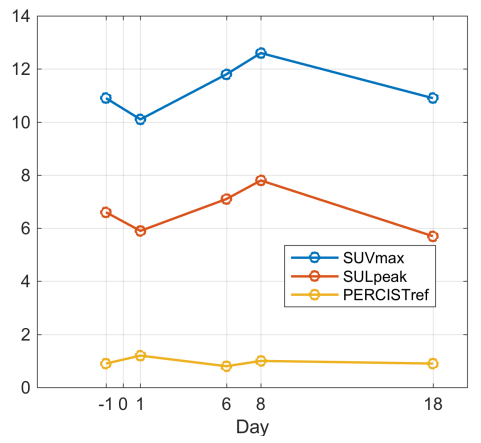

Patient 3

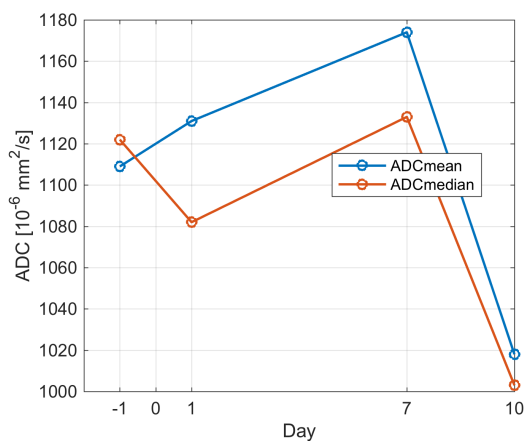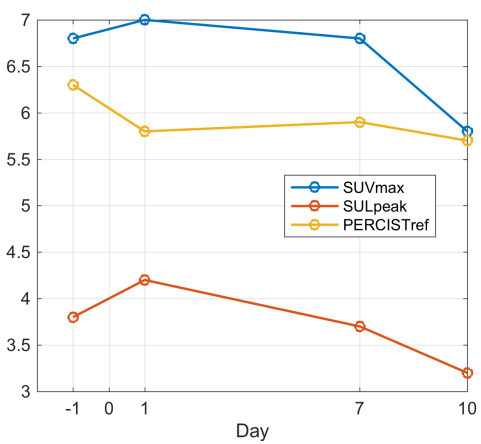

Patient 4

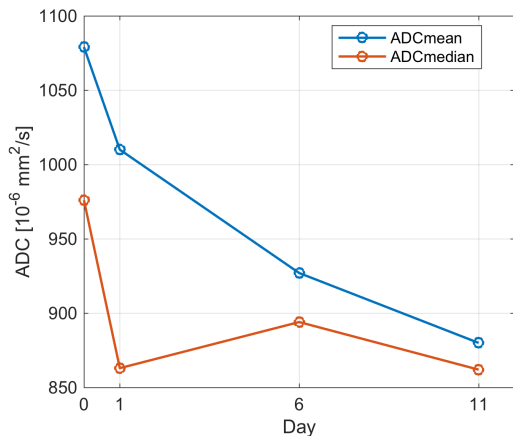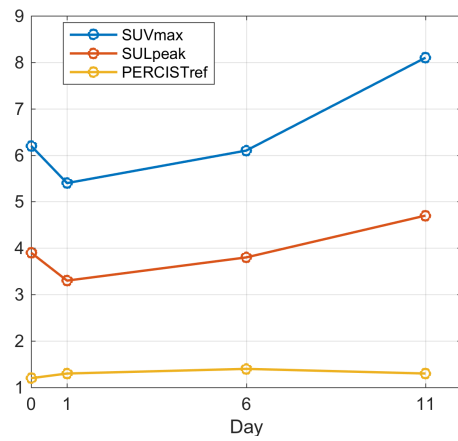

Patient 5

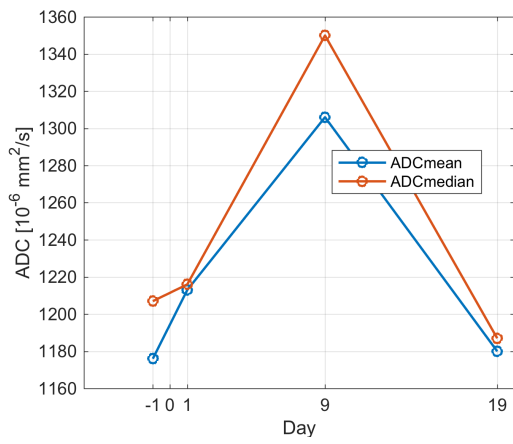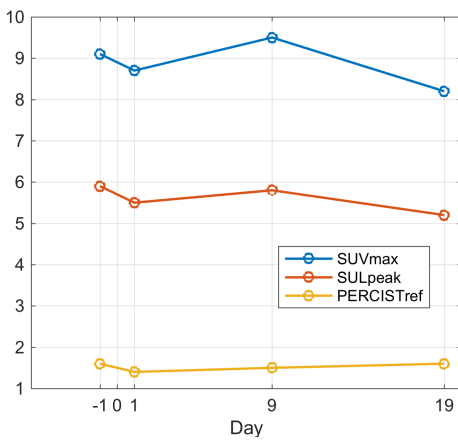

Patient 6

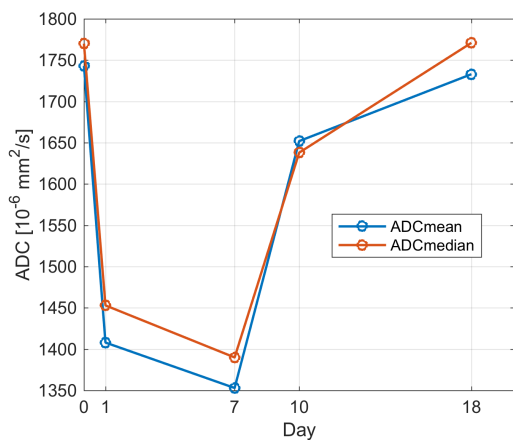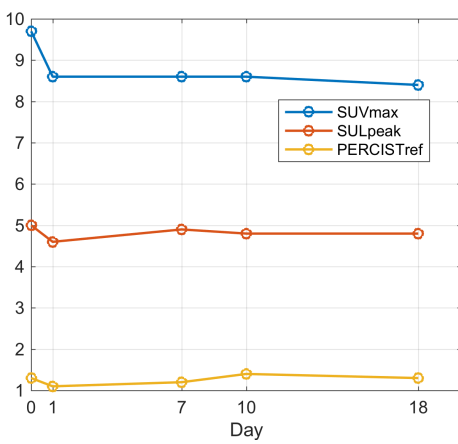

Patient 7

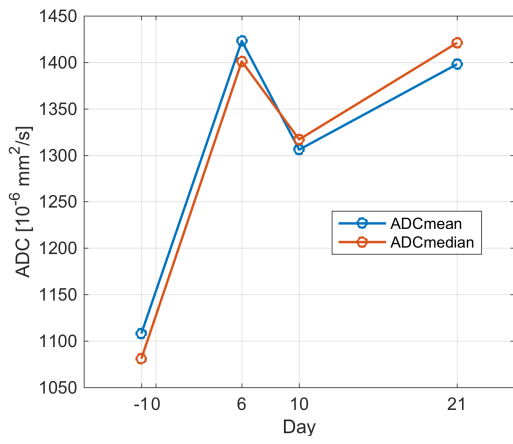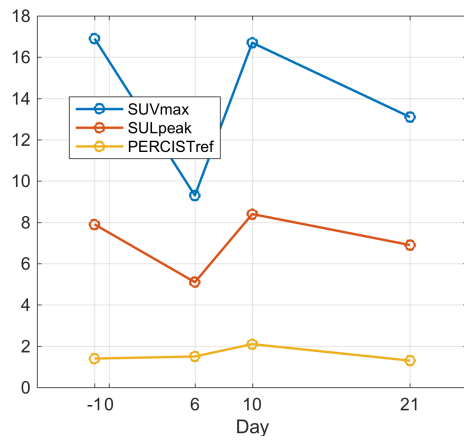

Patient 8

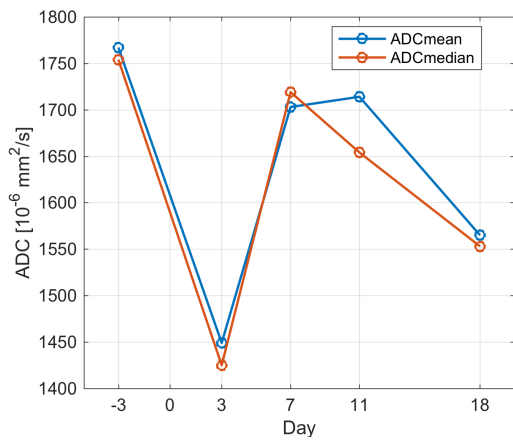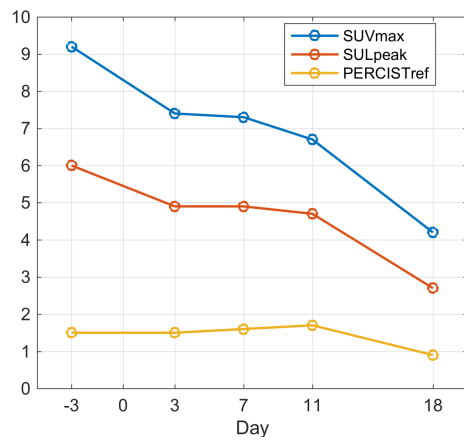

Patient 9

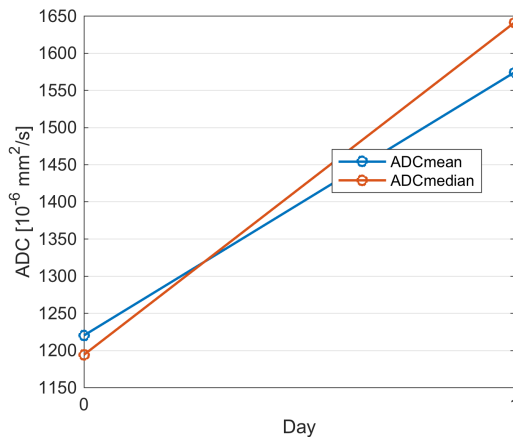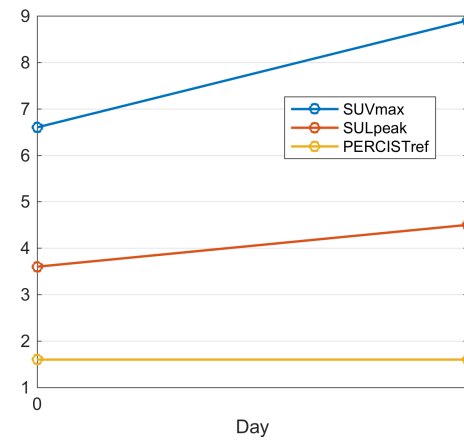

Patient 10

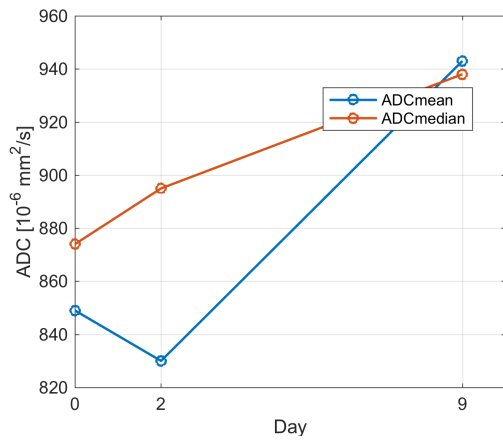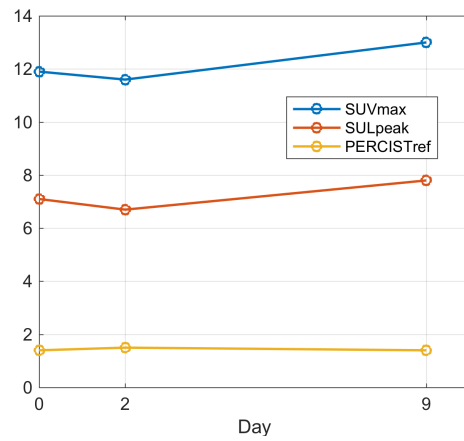

Patient 11

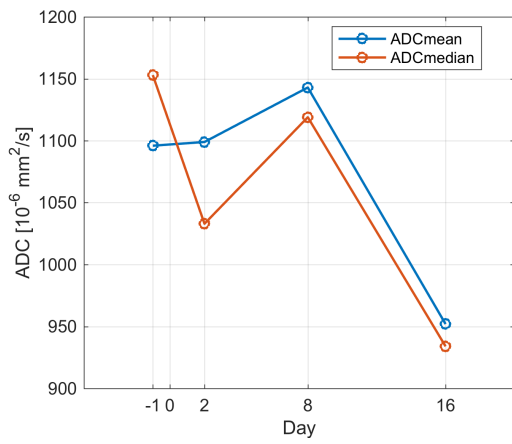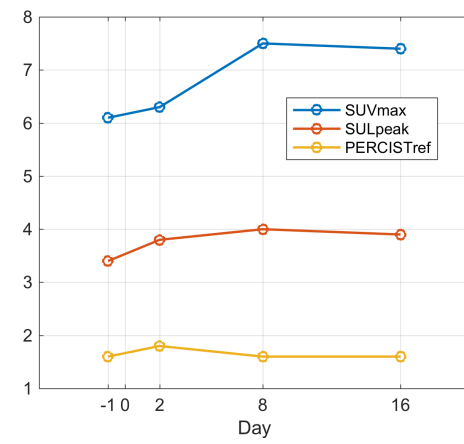

## References

1. O, J.H., M.A. Lodge, and R.L. Wahl, *Practical PERCIST: A Simplified Guide to PET Response Criteria in Solid Tumors 1.0*. Radiology, 2016. **280**(2): p. 576-84.
